# Supplementary material
Source: PubMed Central journal article supplement (PMC6816715)
Supplement: 12195_2018_522_MOESM2_ESM.pdf [file 12195_2018_522_MOESM2_ESM.pdf]

Supplemental Movie 1: Visualization of Propagating Activation. Static activation thresholds are calculated for each pixel, shown as the surface in red. For each pixel, when the fluorescence intensity exceeds the activation threshold, it is assigned a different color, indicating its activation time. Thus, each individual color is an isochrone. The  $z$ -value for each activated pixel indicates fluorescence (a.u.).  $x$ - and  $y$ -axes indicate pixel number, micron to pixel ratio is 26  $\mu\text{m}/\text{px}$ .

#### Supplemental Table 1: Cell Density

All cell density data were normally distributed as determined by Lilliefors' test. Significant values are bold and starred. Values with  $p > 0.1$  are written as NS (Not Significant).

| Comparison                                      | Statistical Test | $p$ -value       |
|-------------------------------------------------|------------------|------------------|
| <i>Subset: Isotropic Tissues</i>                | One-way ANOVA    | <0.09            |
| Stiff PDMS vs Soft PDMS                         | Fisher's LSD     | NS               |
| Stiff PDMS vs Gelatin                           | Fisher's LSD     | <0.10            |
| Soft PDMS vs Gelatin                            | Fisher's LSD     | <b>&lt;0.04*</b> |
| <i>Subset: Aligned Tissues</i>                  | One-way ANOVA    | NS               |
| Stiff PDMS vs Soft PDMS                         | Fisher's LSD     | NS               |
| Stiff PDMS vs Gelatin                           | Fisher's LSD     | NS               |
| Soft PDMS vs Gelatin                            | Fisher's LSD     | NS               |
| <i>Subset: Stiff PDMS, Isotropic vs Aligned</i> | Student's t-test | NS               |
| <i>Subset: Soft PDMS, Isotropic vs Aligned</i>  | Student's t-test | <b>&lt;0.02*</b> |
| <i>Subset: Gelatin, Isotropic vs Aligned</i>    | Student's t-test | NS               |

#### Supplemental Table 2: Cell Alignment

All cell alignment data were normally distributed as determined by Lilliefors' test. Significant values are bold and starred. Values with  $p > 0.1$  are written as NS (Not Significant).

| Comparison                                      | Statistical Test | $p$ -value         |
|-------------------------------------------------|------------------|--------------------|
| <i>Subset: Isotropic Tissues</i>                | One-way ANOVA    | NS                 |
| Stiff PDMS vs Soft PDMS                         | Fisher's LSD     | NS                 |
| Stiff PDMS vs Gelatin                           | Fisher's LSD     | NS                 |
| Soft PDMS vs Gelatin                            | Fisher's LSD     | NS                 |
| <i>Subset: Aligned Tissues</i>                  | One-way ANOVA    | <0.0003            |
| Stiff PDMS vs Soft PDMS                         | Fisher's LSD     | NS                 |
| Stiff PDMS vs Gelatin                           | Fisher's LSD     | <b>&lt;0.0004*</b> |
| Soft PDMS vs Gelatin                            | Fisher's LSD     | <b>&lt;0.0003*</b> |
| <i>Subset: Stiff PDMS, Isotropic vs Aligned</i> | Student's t-test | <b>&lt;0.0001*</b> |
| <i>Subset: Soft PDMS, Isotropic vs Aligned</i>  | Student's t-test | <b>&lt;0.0001*</b> |
| <i>Subset: Gelatin, Isotropic vs Aligned</i>    | Student's t-test | <b>&lt;0.0001*</b> |

### Supplemental Table 3: Cell Length

All cell length data were normally distributed as determined by Lilliefors' test. Significant values are bold and starred. Values with  $p > 0.1$  are written as NS (Not Significant).

| Comparison                                      | Statistical Test | <i>p</i> -value   |
|-------------------------------------------------|------------------|-------------------|
| <i>Subset: Isotropic Tissues</i>                | One-way ANOVA    | NS                |
| Stiff PDMS vs Soft PDMS                         | Fisher's LSD     | NS                |
| Stiff PDMS vs Gelatin                           | Fisher's LSD     | NS                |
| Soft PDMS vs Gelatin                            | Fisher's LSD     | <0.07             |
| <i>Subset: Aligned Tissues</i>                  | One-way ANOVA    | NS                |
| Stiff PDMS vs Soft PDMS                         | Fisher's LSD     | NS                |
| Stiff PDMS vs Gelatin                           | Fisher's LSD     | <0.08             |
| Soft PDMS vs Gelatin                            | Fisher's LSD     | NS                |
| <i>Subset: Stiff PDMS, Isotropic vs Aligned</i> | Student's t-test | < <b>0.0001</b> * |
| <i>Subset: Soft PDMS, Isotropic vs Aligned</i>  | Student's t-test | < <b>0.0003</b> * |
| <i>Subset: Gelatin, Isotropic vs Aligned</i>    | Student's t-test | < <b>0.0002</b> * |

### Supplemental Table 4: Cell Width

All cell width data were normally distributed as determined by Lilliefors' test. Significant values are bold and starred. Values with  $p > 0.1$  are written as NS (Not Significant).

| Comparison                                      | Statistical Test | <i>p</i> -value   |
|-------------------------------------------------|------------------|-------------------|
| <i>Subset: Isotropic Tissues</i>                | One-way ANOVA    | NS                |
| Stiff PDMS vs Soft PDMS                         | Fisher's LSD     | NS                |
| Stiff PDMS vs Gelatin                           | Fisher's LSD     | NS                |
| Soft PDMS vs Gelatin                            | Fisher's LSD     | NS                |
| <i>Subset: Aligned Tissues</i>                  | One-way ANOVA    | <0.03             |
| Stiff PDMS vs Soft PDMS                         | Fisher's LSD     | NS                |
| Stiff PDMS vs Gelatin                           | Fisher's LSD     | < <b>0.04</b> *   |
| Soft PDMS vs Gelatin                            | Fisher's LSD     | < <b>0.02</b> *   |
| <i>Subset: Stiff PDMS, Isotropic vs Aligned</i> | Student's t-test | < <b>0.0001</b> * |
| <i>Subset: Soft PDMS, Isotropic vs Aligned</i>  | Student's t-test | < <b>0.0001</b> * |
| <i>Subset: Gelatin, Isotropic vs Aligned</i>    | Student's t-test | < <b>0.0001</b> * |

Supplemental Table 5: Cell Aspect Ratio

Cell aspect ratio data were not normally distributed as determined by Lilliefors' test. Significant values are bold and starred. Values with  $p > 0.1$  are written as NS (Not Significant).

| <b>Comparison</b>                               | <b>Statistical Test</b> | <b>p-value</b>     |
|-------------------------------------------------|-------------------------|--------------------|
| <i>Subset: Isotropic Tissues</i>                | Kruskal-Wallis          | NS                 |
| Stiff PDMS vs Soft PDMS                         | Fisher's LSD            | <b>&lt;0.05*</b>   |
| Stiff PDMS vs Gelatin                           | Fisher's LSD            | NS                 |
| Soft PDMS vs Gelatin                            | Fisher's LSD            | NS                 |
| <i>Subset: Aligned Tissues</i>                  | Kruskal-Wallis          | <0.09              |
| Stiff PDMS vs Soft PDMS                         | Fisher's LSD            | <0.08              |
| Stiff PDMS vs Gelatin                           | Fisher's LSD            | NS                 |
| Soft PDMS vs Gelatin                            | Fisher's LSD            | <b>&lt;0.05*</b>   |
| <i>Subset: Stiff PDMS, Isotropic vs Aligned</i> | Student's t-test        | <b>&lt;0.0001*</b> |
| <i>Subset: Soft PDMS, Isotropic vs Aligned</i>  | Student's t-test        | <b>&lt;0.0001*</b> |
| <i>Subset: Gelatin, Isotropic vs Aligned</i>    | Student's t-test        | <b>&lt;0.0001*</b> |

Supplemental Table 6: Full FOV vs Uniaxial Conduction Velocity

Conduction velocity data comparing FOV choice were not normally distributed as determined by Lilliefors' test. Significant values are bold and starred. Values with  $p > 0.1$  are written as NS (Not Significant).

| <b>Comparison</b>                       | <b>Statistical Test</b> | <b>p-value</b>   |
|-----------------------------------------|-------------------------|------------------|
| <i>Subset: Stiff PDMS, Isotropic</i>    | Student's t-test        | NS               |
| <i>Subset: Stiff PDMS, Longitudinal</i> | Student's t-test        | <b>&lt;0.04*</b> |
| <i>Subset: Stiff PDMS, Transverse</i>   | Student's t-test        | NS               |
| <i>Subset: Soft PDMS, Isotropic</i>     | Student's t-test        | NS               |
| <i>Subset: Soft PDMS, Longitudinal</i>  | Student's t-test        | <0.09            |
| <i>Subset: Soft PDMS, Transverse</i>    | Student's t-test        | NS               |
| <i>Subset: Gelatin, Isotropic</i>       | Student's t-test        | NS               |
| <i>Subset: Gelatin, Longitudinal</i>    | Student's t-test        | NS               |
| <i>Subset: Gelatin, Transverse</i>      | Student's t-test        | NS               |

Supplemental Table 7: Uniaxial Conduction Velocity

Uniaxial conduction velocity data were not normally distributed as determined by Lilliefors' test. Significant values are bold and starred. Values with  $p > 0.1$  are written as NS (Not Significant).

| Comparison                                   | Statistical Test | p-value  |
|----------------------------------------------|------------------|----------|
| <i>Subset: Isotropic Tissues</i>             | Kruskal-Wallis   | NS       |
| Stiff PDMS vs Soft PDMS                      | Fisher's LSD     | NS       |
| Stiff PDMS vs Gelatin                        | Fisher's LSD     | NS       |
| Soft PDMS vs Gelatin                         | Fisher's LSD     | NS       |
| <i>Subset: Aligned Tissues, Longitudinal</i> | Kruskal-Wallis   | NS       |
| Stiff PDMS vs Soft PDMS                      | Fisher's LSD     | NS       |
| Stiff PDMS vs Gelatin                        | Fisher's LSD     | NS       |
| Soft PDMS vs Gelatin                         | Fisher's LSD     | NS       |
| <i>Subset: Aligned Tissues, Transverse</i>   | Kruskal-Wallis   | <0.009   |
| Stiff PDMS vs Soft PDMS                      | Fisher's LSD     | NS       |
| Stiff PDMS vs Gelatin                        | Fisher's LSD     | <0.04*   |
| Soft PDMS vs Gelatin                         | Fisher's LSD     | <0.003*  |
| <i>Subset: Stiff PDMS</i>                    | Kruskal-Wallis   | <0.002   |
| Isotropic vs Longitudinal                    | Fisher's LSD     | NS       |
| Isotropic vs Transverse                      | Fisher's LSD     | <0.003*  |
| Longitudinal vs Transverse                   | Fisher's LSD     | <0.0005* |
| <i>Subset: Soft PDMS</i>                     | Kruskal-Wallis   | <0.007   |
| Isotropic vs Longitudinal                    | Fisher's LSD     | NS       |
| Isotropic vs Transverse                      | Fisher's LSD     | <0.02*   |
| Longitudinal vs Transverse                   | Fisher's LSD     | <0.003*  |
| <i>Subset: Gelatin</i>                       | Kruskal-Wallis   | <0.0006  |
| Isotropic vs Longitudinal                    | Fisher's LSD     | NS       |
| Isotropic vs Transverse                      | Fisher's LSD     | <0.002*  |
| Longitudinal vs Transverse                   | Fisher's LSD     | <0.0003* |

Supplemental Table 8: Uniaxial Conduction Velocity Anisotropy Ratio

All anisotropy ratio data were normally distributed as determined by Lilliefors' test. Significant values are bold and starred. Values with  $p > 0.1$  are written as NS (Not Significant).

| Comparison                     | Statistical Test | p-value  |
|--------------------------------|------------------|----------|
| <i>Subset: Aligned Tissues</i> | One-way ANOVA    | <0.002   |
| Stiff PDMS vs Soft PDMS        | Fisher's LSD     | <0.03*   |
| Stiff PDMS vs Gelatin          | Fisher's LSD     | <0.07    |
| Soft PDMS vs Gelatin           | Fisher's LSD     | <0.0003* |
